# Supplementary material for: Association of Health Literacy Among Nulliparous Individuals and Maternal and Neonatal Outcomes
Source: PubMed Central journal article supplement (PMC8411280; doi:10.1001/jamanetworkopen.2021.22576), 2021-09-01
Supplement: jamanetwopen-e2122576-s001.pdf [file jamanetwopen-e2122576-s001.pdf]

## Supplemental Online Content

Yee LM, Silver R, Haas DM, et al. Association of health literacy among nulliparous individuals and maternal and neonatal outcomes. *JAMA Netw Open*. 2021;4(9):e2122576. doi:10.1001/jamanetworkopen.2021.22576

**eFigure.** Directed Acyclic Graph

This supplemental material has been provided by the authors to give readers additional information about their work.

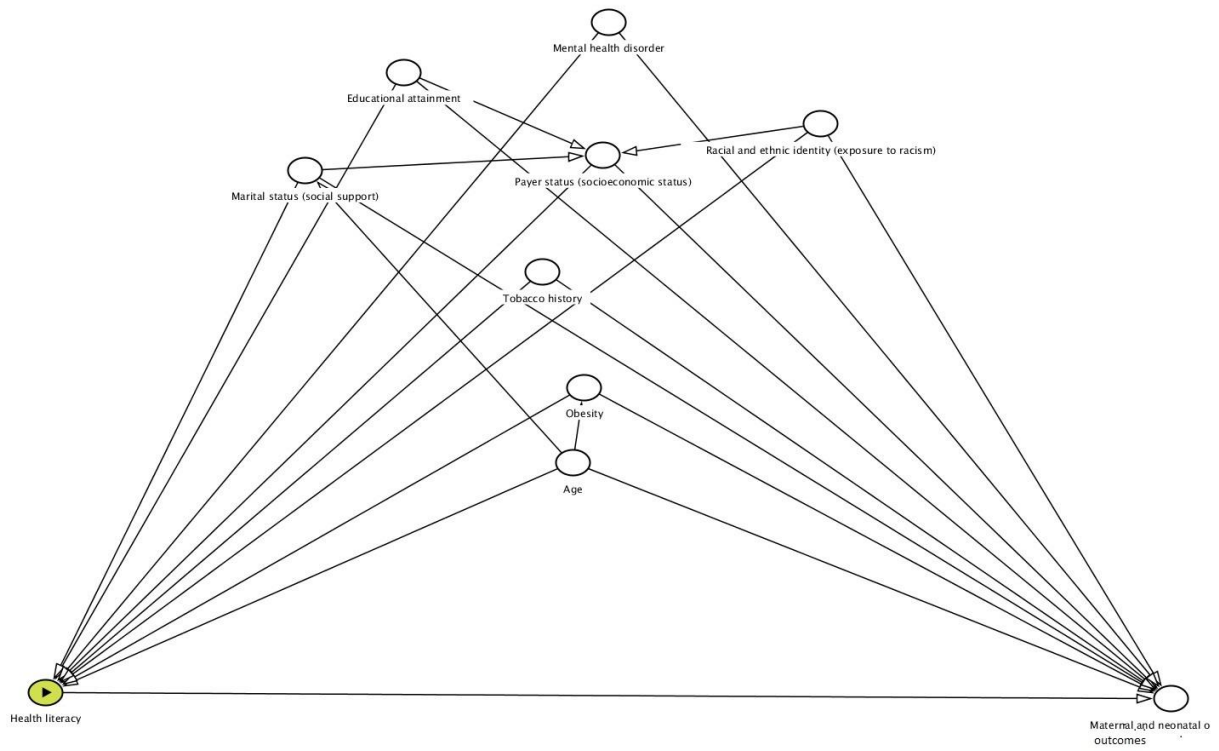

**eFigure.** Directed Acyclic Graph
